# Supplementary material for: Effect of perioperative sodium bicarbonate administration on renal function following cardiac surgery for infective endocarditis: a randomized, placebo-controlled trial
Source: Springer Nature journal article supplement (doi:10.1186/s13054-016-1591-z), 2017-01-05
Supplement: MOESM1 [file 11981962]

Table. Perioperative hemodynamic variables

| Variables                                | Time points | Control group<br>(n = 35) | Bicarbonate group<br>(n = 35) | P <sub>Group x Time</sub> |
|------------------------------------------|-------------|---------------------------|-------------------------------|---------------------------|
| Heart rate (beat/min)                    | T0          | 72.7 ± 14.2               | 75.5 ± 13.7                   | 0.699                     |
|                                          | T1          | 86.2 ± 13.4*              | 89.1 ± 13.0*                  |                           |
|                                          | T2          | 88.9 ± 11.3*              | 91.0 ± 10.6*                  |                           |
|                                          | T3          | 87.8 ± 13.8*              | 92.9 ± 14.2*                  |                           |
|                                          | T4          | 83.6 ± 15.4*              | 84.7 ± 15.0*                  |                           |
|                                          | T5          | 82.0 ± 12.4*              | 87.2 ± 11.4*                  |                           |
| Mean blood pressure<br>(mmHg)            | T0          | 72.3 ± 9.6                | 74.2 ± 9.1                    | 0.950                     |
|                                          | T1          | 68.0 ± 7.8*               | 69.6 ± 9.3*                   |                           |
|                                          | T2          | 72.4 ± 8.3                | 75.0 ± 9.3                    |                           |
|                                          | T3          | 79.6 ± 11.4*              | 82.5 ± 10.8*                  |                           |
|                                          | T4          | 80.7 ± 10.4*              | 83.1 ± 10.9*                  |                           |
|                                          | T5          | 82.4 ± 7.1*               | 83.7 ± 11.8*                  |                           |
| Mean pulmonary artery<br>pressure (mmHg) | T0          | 23.9 ± 10.2               | 22.4 ± 7.2                    | 0.361                     |
|                                          | T1          | 19.3 ± 4.6*               | 19.7 ± 4.5*                   |                           |
|                                          | T2          | 20.7 ± 4.8*               | 20.5 ± 4.2                    |                           |
|                                          | T3          | 18.2 ± 4.5*               | 19.4 ± 5.9*                   |                           |
|                                          | T4          | 17.7 ± 4.7*               | 17.7 ± 4.8*                   |                           |
|                                          | T5          | 19.0 ± 6.1*               | 21.3 ± 5.8                    |                           |
| Central venous pressure<br>(mmHg)        | T0          | 10.3 ± 3.6                | 9.6 ± 2.9                     | 0.409                     |
|                                          | T1          | 9.7 ± 2.4                 | 10.3 ± 3.2                    |                           |
|                                          | T2          | 11.6 ± 2.5*               | 11.8 ± 2.4*                   |                           |
|                                          | T3          | 7.6 ± 2.6*                | 8.6 ± 3.2                     |                           |
|                                          | T4          | 9.0 ± 3.5*                | 8.8 ± 3.0                     |                           |
|                                          | T5          | 9.3 ± 3.0                 | 10.5 ± 3.8                    |                           |

|                                       |    |            |            |       |
|---------------------------------------|----|------------|------------|-------|
| Cardiac index (l/min/m <sup>2</sup> ) | T0 | 2.6 ± 0.6  | 2.6 ± 0.8  | 0.939 |
|                                       | T1 | 2.8 ± 0.7  | 2.8 ± 0.6  |       |
|                                       | T2 | 2.7 ± 0.6  | 2.7 ± 0.7  |       |
|                                       | T3 | 3.0 ± 0.6* | 3.2 ± 1.0* |       |
|                                       | T4 | 3.3 ± 0.5* | 3.2 ± 0.7* |       |
|                                       | T5 | 3.0 ± 0.6  | 3.0 ± 0.4  |       |

Values are mean ± standard deviation.

T0, before surgery; T1, after cardiopulmonary bypass; T2, at sternum closure; T3, at intensive care unit arrival; T4, 24 h after surgery; T5, 48 h after surgery;  $P_{\text{Group} \times \text{Time}}$ , P-value for the group × time interaction in the linear mixed model.

\*  $P < 0.05$  vs. baseline value.
