# Supplementary material for: Effect of perioperative sodium bicarbonate administration on renal function following cardiac surgery for infective endocarditis: a randomized, placebo-controlled trial
Source: Springer Nature journal article supplement (doi:10.1186/s13054-016-1591-z), 2017-01-05
Supplement: MOESM2 [file 11981962]

Table. Perioperative body temperature and laboratory findings

| Variables                              | Time points    | Control group<br>(n = 35) | Bicarbonate group<br>(n = 35) | P <sub>Group × Time</sub> |
|----------------------------------------|----------------|---------------------------|-------------------------------|---------------------------|
| Body temperature (°C)                  | Before surgery | 37.0 ± 0.6                | 37.0 ± 0.6                    | 0.621                     |
|                                        | POD 1          | 37.7 ± 0.5*               | 37.7 ± 0.4*                   |                           |
|                                        | POD 2          | 37.5 ± 0.4*               | 37.5 ± 0.4*                   |                           |
|                                        | POD 3          | 37.2 ± 0.5                | 37.5 ± 0.4*                   |                           |
|                                        | POD 5          | 37.2 ± 0.5                | 37.2 ± 0.4                    |                           |
| C-reactive protein (mg/l)              | Before surgery | 45.7 ± 41.3               | 32.9 ± 29.3                   | 0.611                     |
|                                        | POD 1          | 88.5 ± 35.0*              | 88.8 ± 39.7*                  |                           |
|                                        | POD 2          | 171.4 ± 46.4*             | 186.0 ± 58.6*                 |                           |
|                                        | POD 3          | 124.0 ± 58.9*             | 132.7 ± 43.8*                 |                           |
|                                        | POD 5          | 69.8 ± 54.0*              | 69.4 ± 35.7*                  |                           |
| White blood cell (10 <sup>3</sup> /μl) | Before surgery | 8.90 ± 3.96               | 7.65 ± 3.97                   | 0.511                     |
|                                        | POD 1          | 14.32 ± 5.86*             | 16.15 ± 7.02*                 |                           |
|                                        | POD 2          | 13.33 ± 5.08*             | 14.84 ± 5.71*                 |                           |
|                                        | POD 3          | 10.15 ± 3.21*             | 11.22 ± 3.74*                 |                           |
|                                        | POD 5          | 7.47 ± 2.83*              | 7.99 ± 2.62                   |                           |
| Neutrophil (%)                         | Before surgery | 71.4 ± 12.4               | 69.4 ± 12.5                   | 0.539                     |
|                                        | POD 1          | 88.5 ± 3.4*               | 88.7 ± 4.4*                   |                           |
|                                        | POD 2          | 85.5 ± 4.2*               | 84.9 ± 5.1*                   |                           |
|                                        | POD 3          | 80.1 ± 5.6*               | 80.9 ± 6.3*                   |                           |
|                                        | POD 5          | 69.5 ± 9.5                | 70.5 ± 9.4                    |                           |

Values are mean ± standard deviation.

POD, postoperative day; P<sub>Group × Time</sub>, P-value for the group × time interaction in the linear mixed model.

\*  $P < 0.05$  vs. baseline value
